# Supplementary material
Source: ML conference proceedings conference paper supplement (https://openreview.net/forum?id=t4VwoIYBf0)

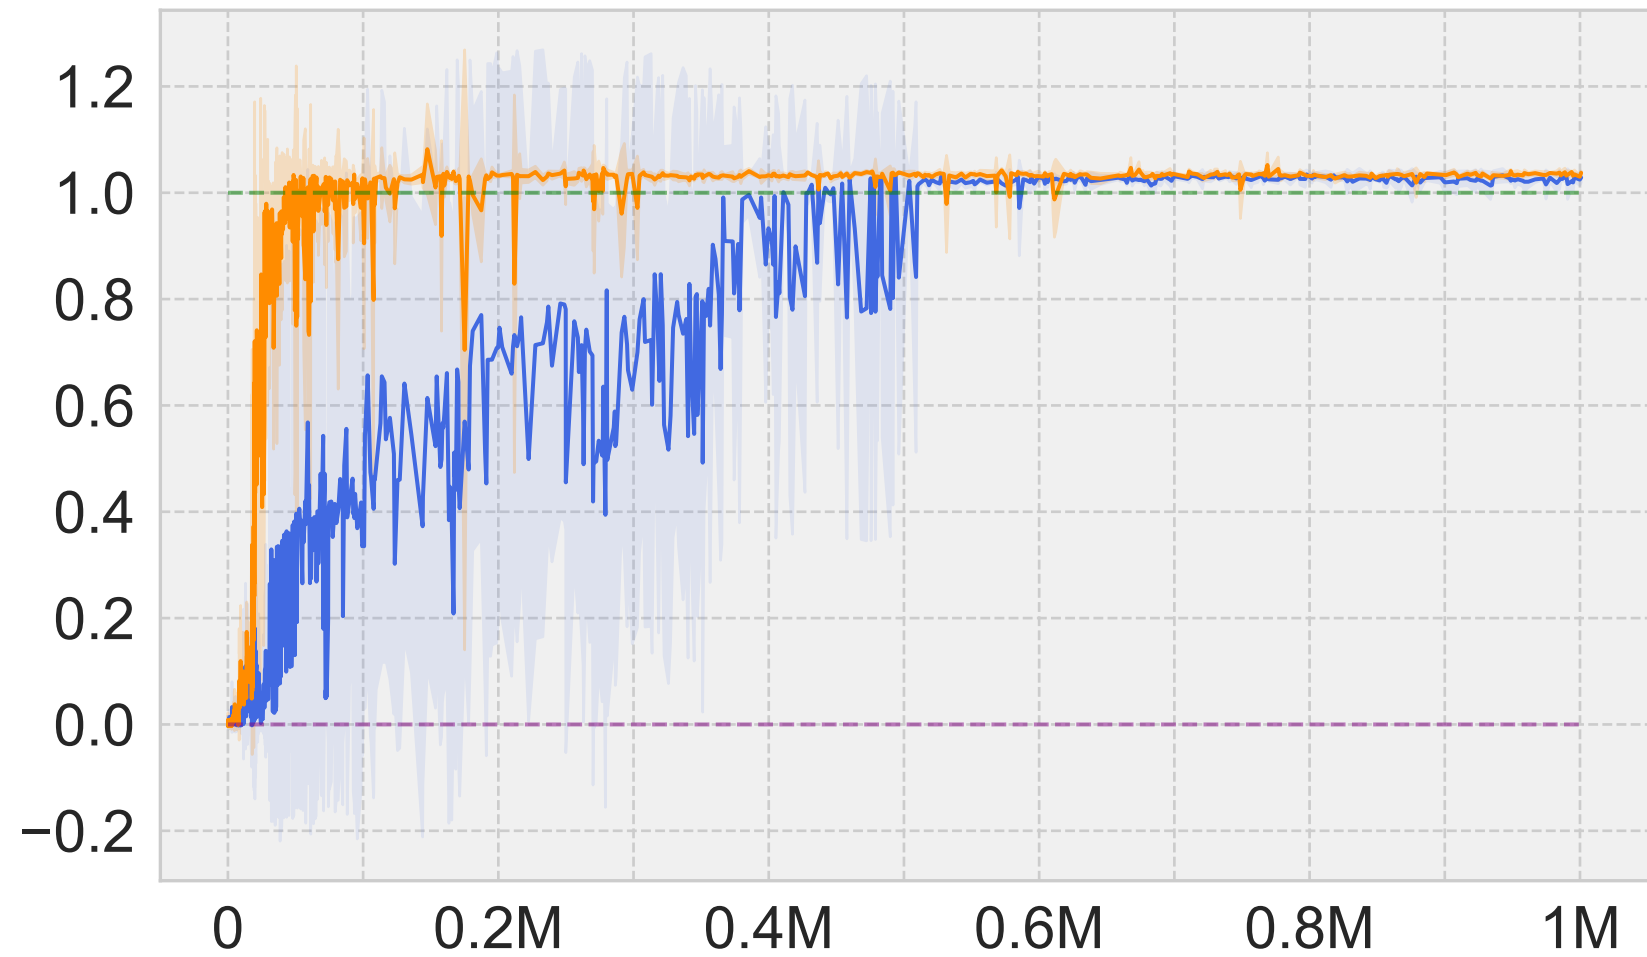

Supplement: supplementary_material [file attachment]

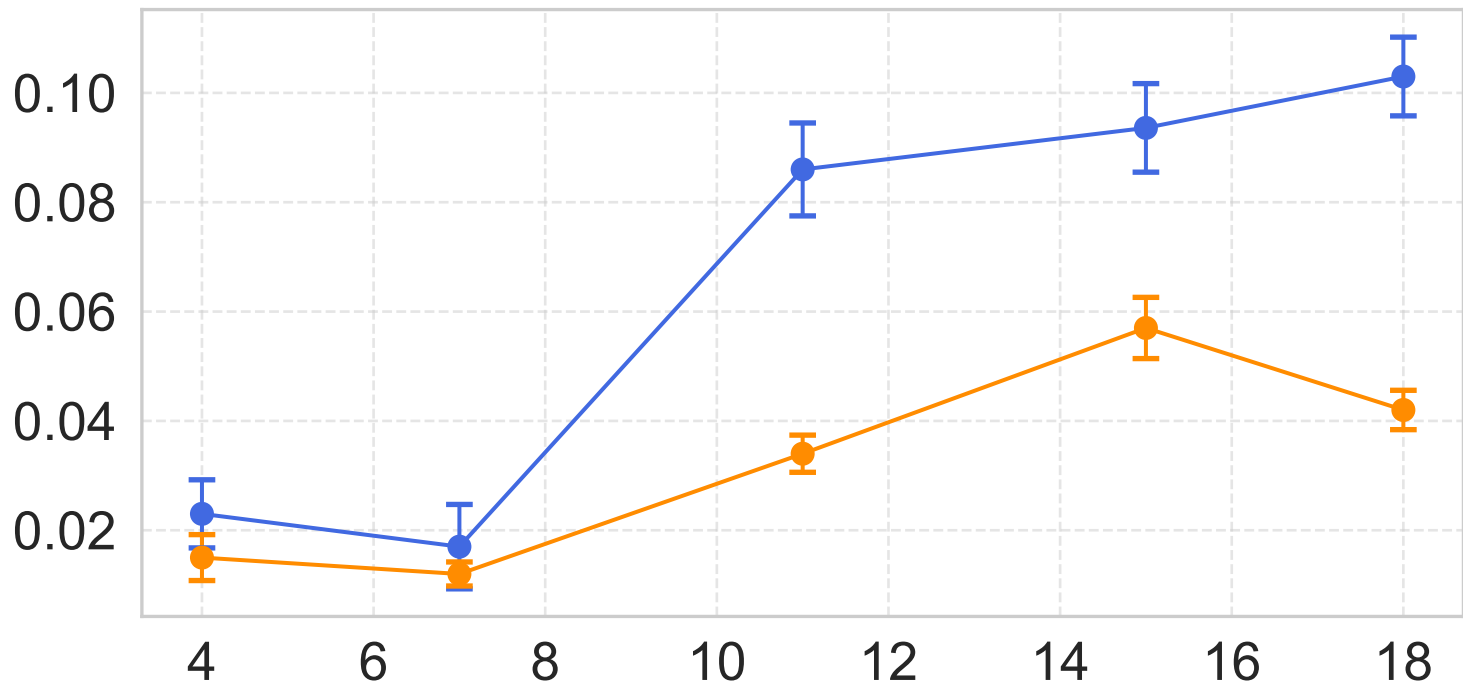

Supplement: supplementary_material [file attachment]

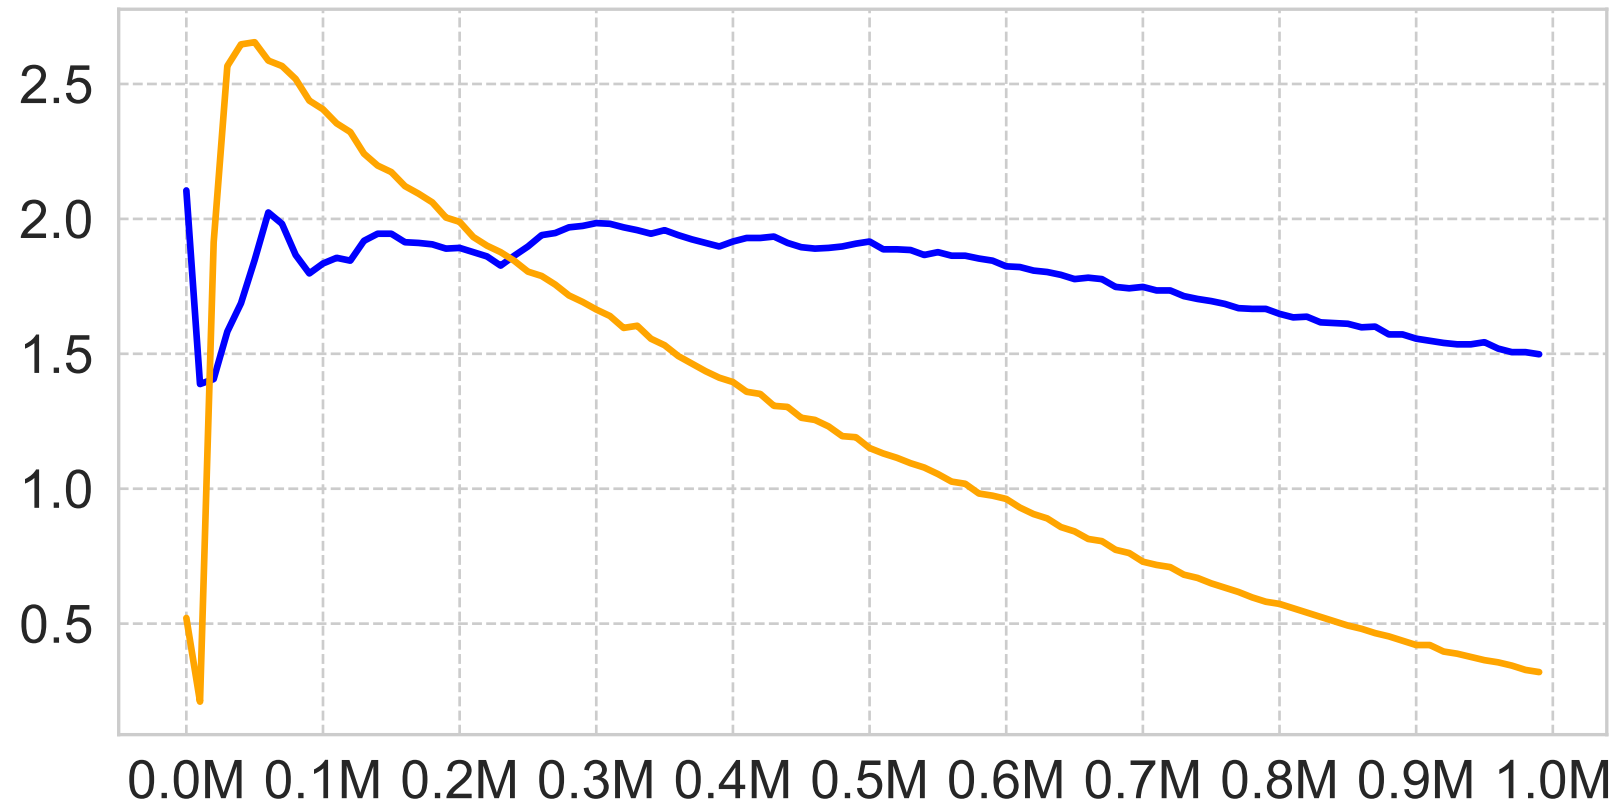

Supplement: supplementary_material [file attachment]

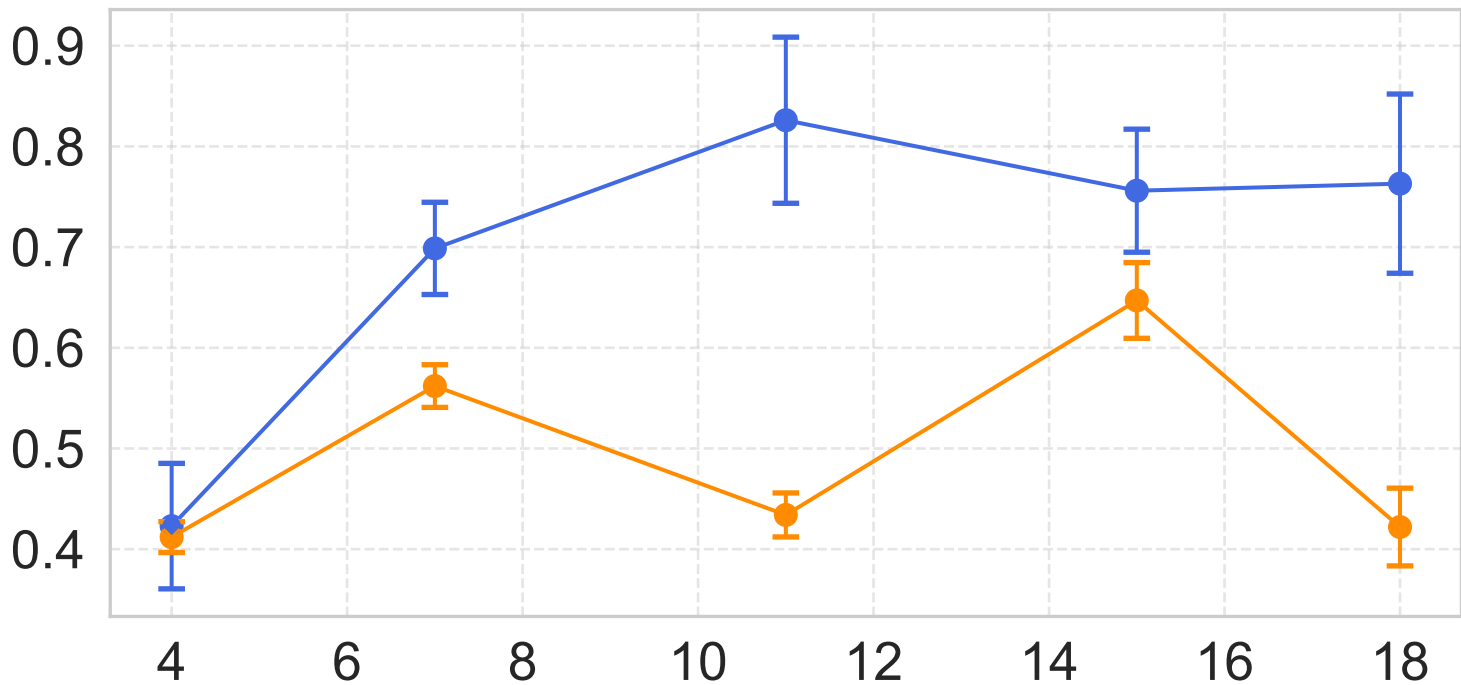

Supplement: supplementary_material [file attachment]

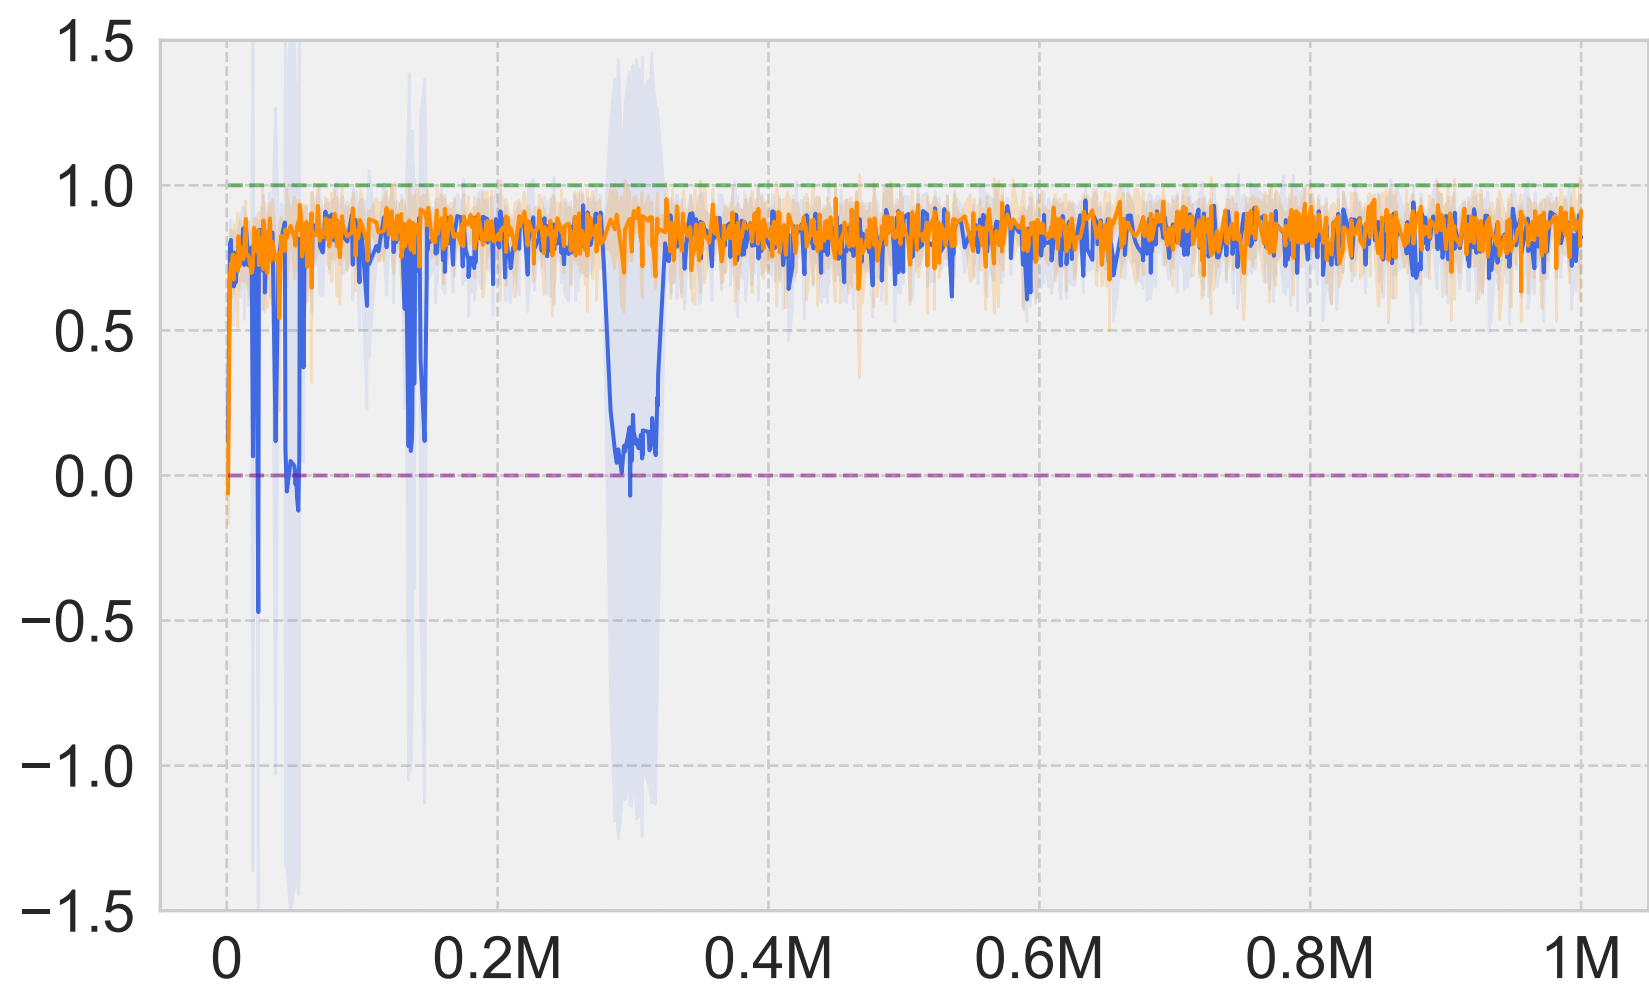

Supplement: supplementary_material [file attachment]

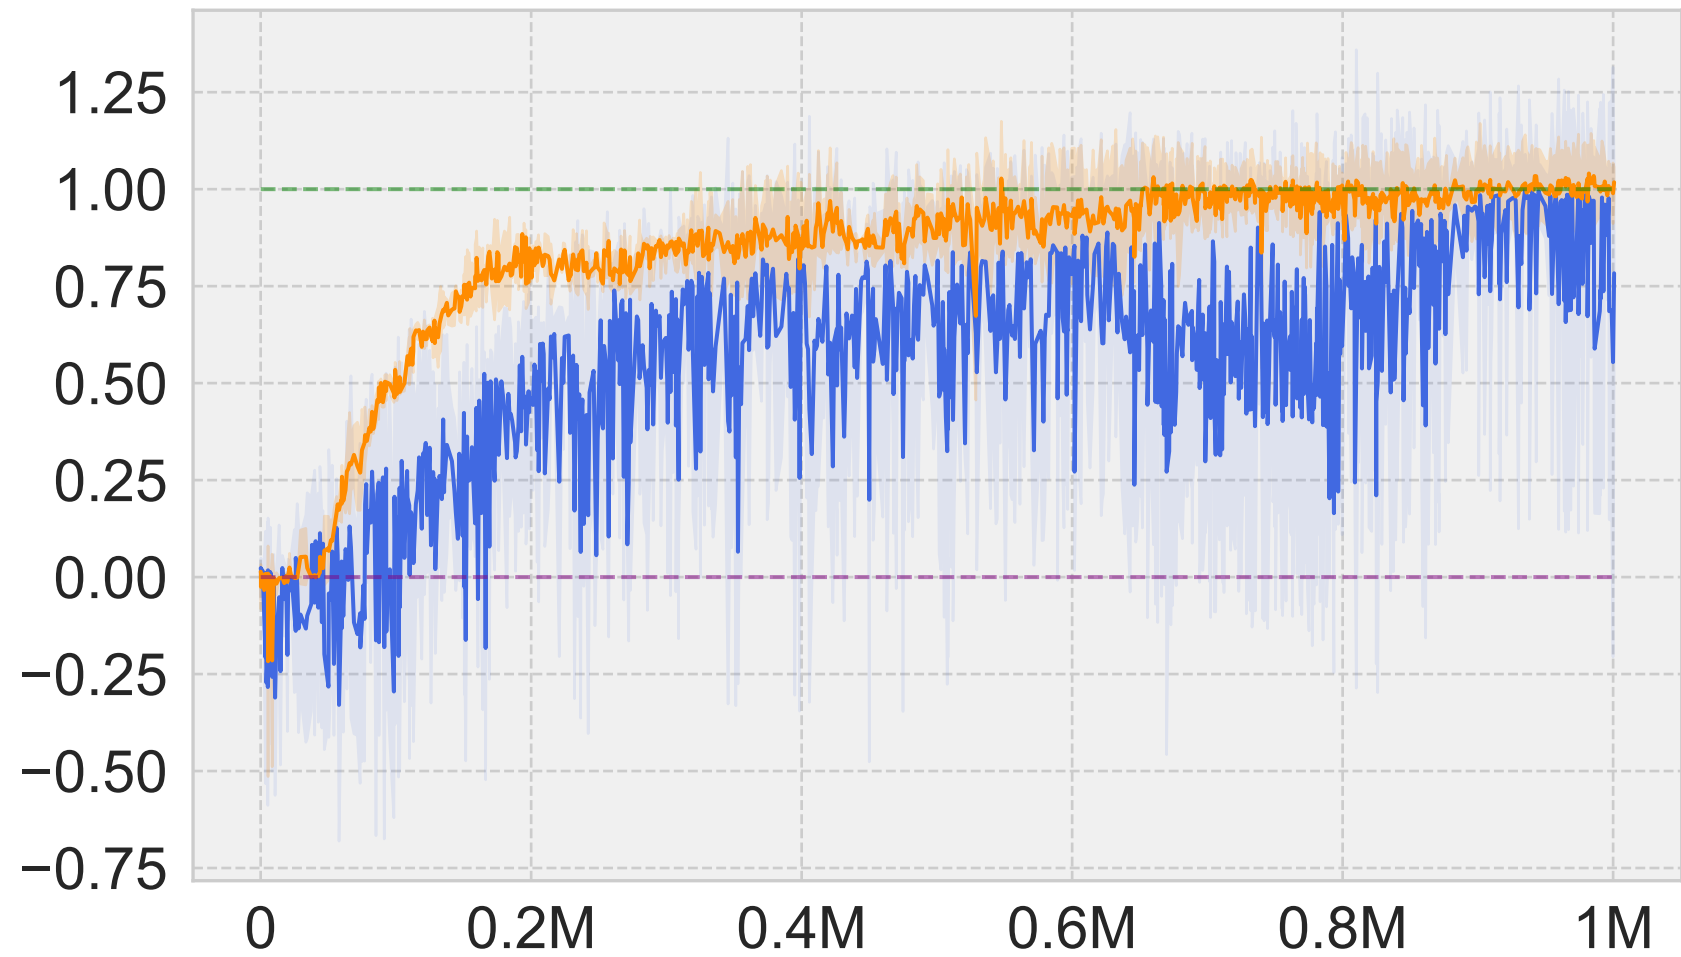

Supplement: supplementary_material [file attachment]

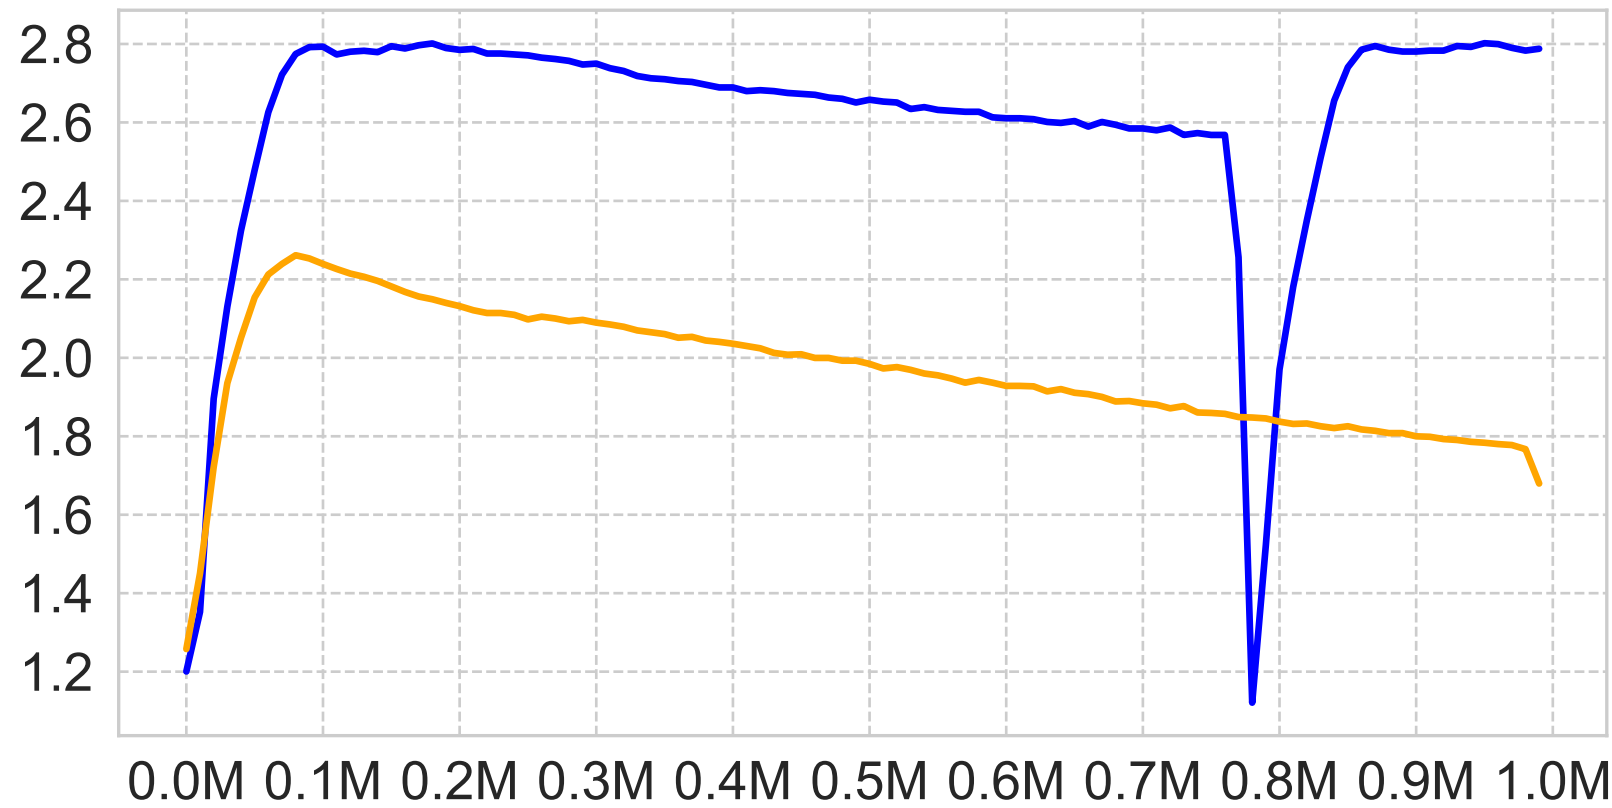

Supplement: supplementary_material [file attachment]

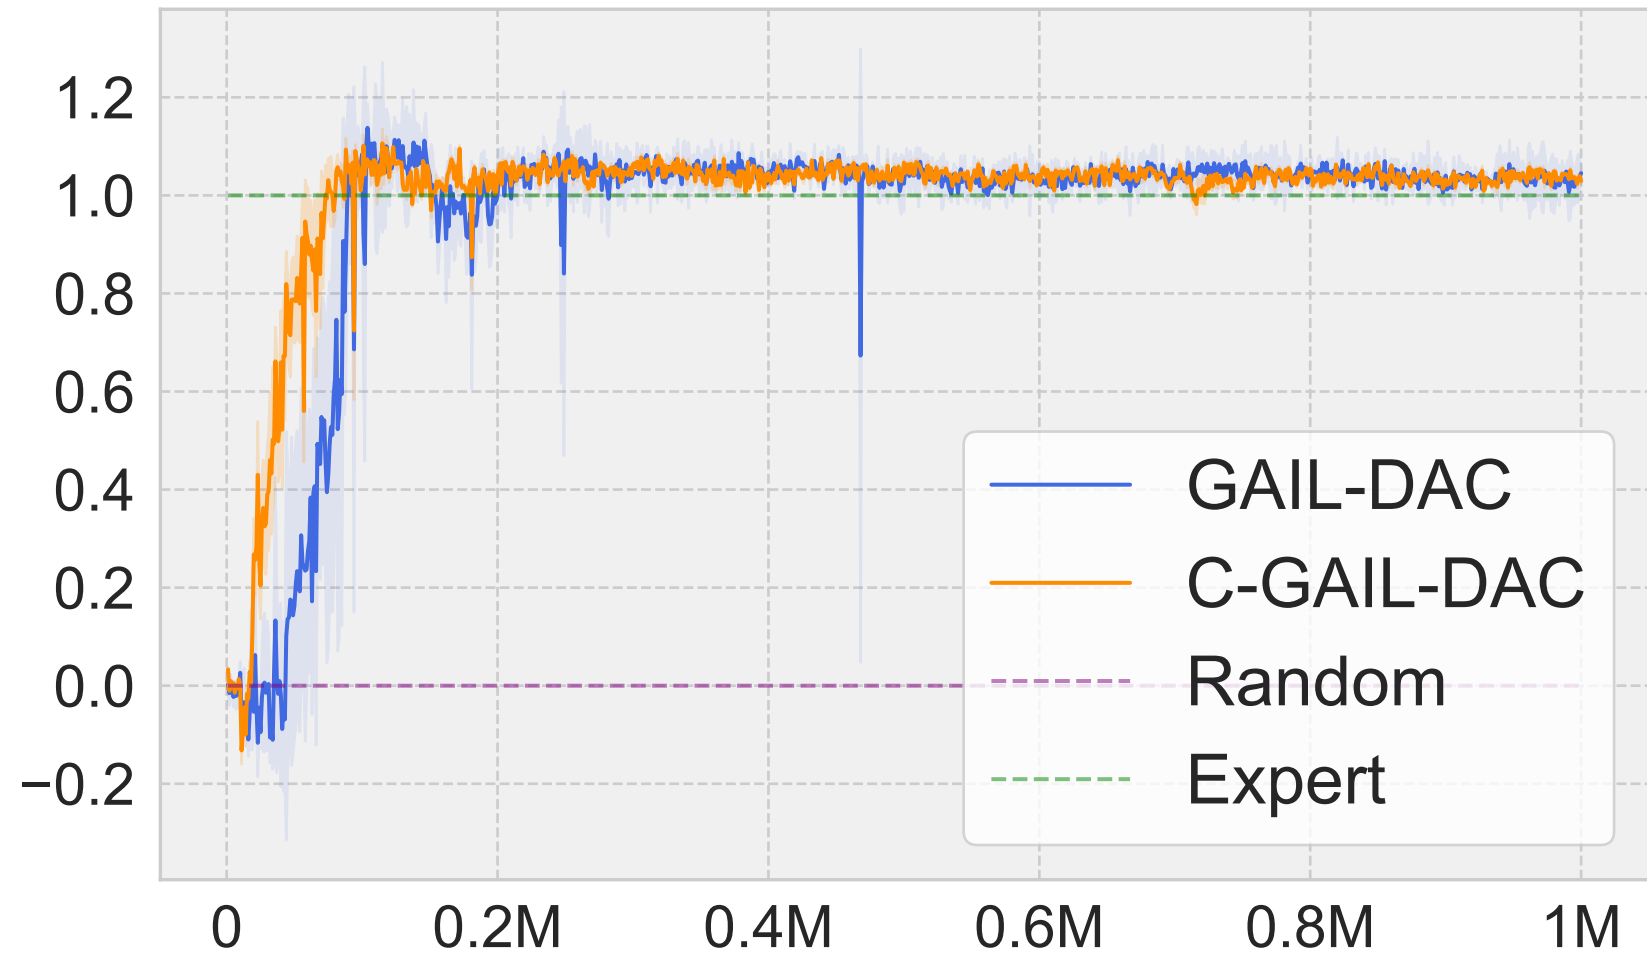

Supplement: supplementary_material [file attachment]

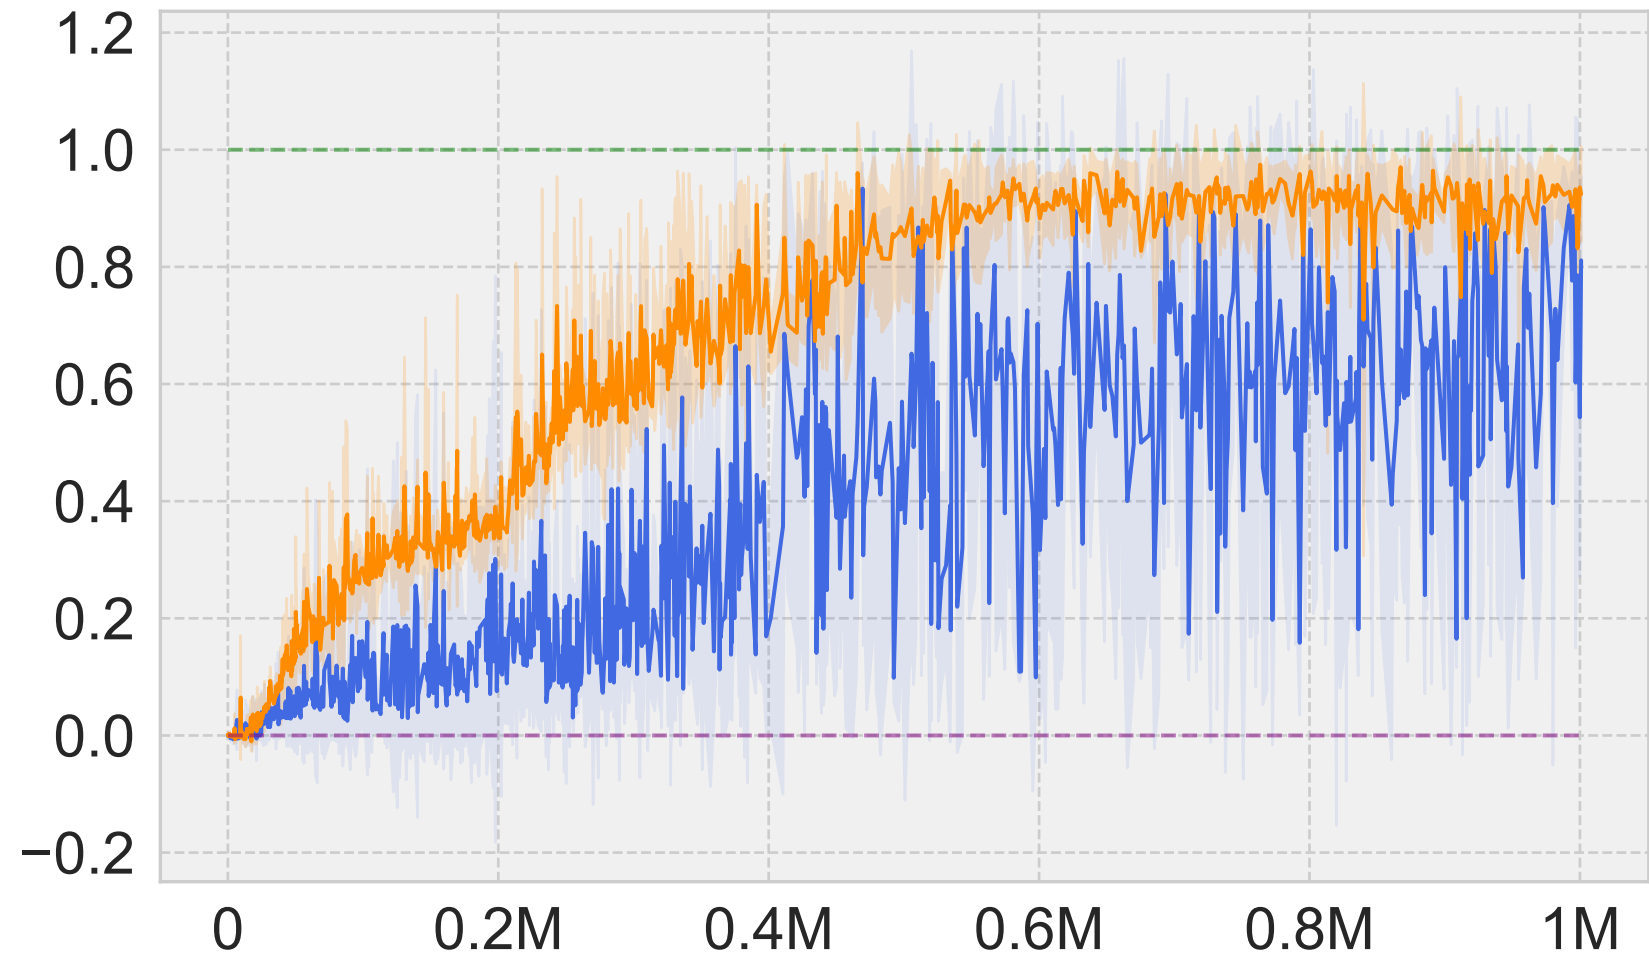

Supplement: supplementary_material [file attachment]

Return Plot for Ants

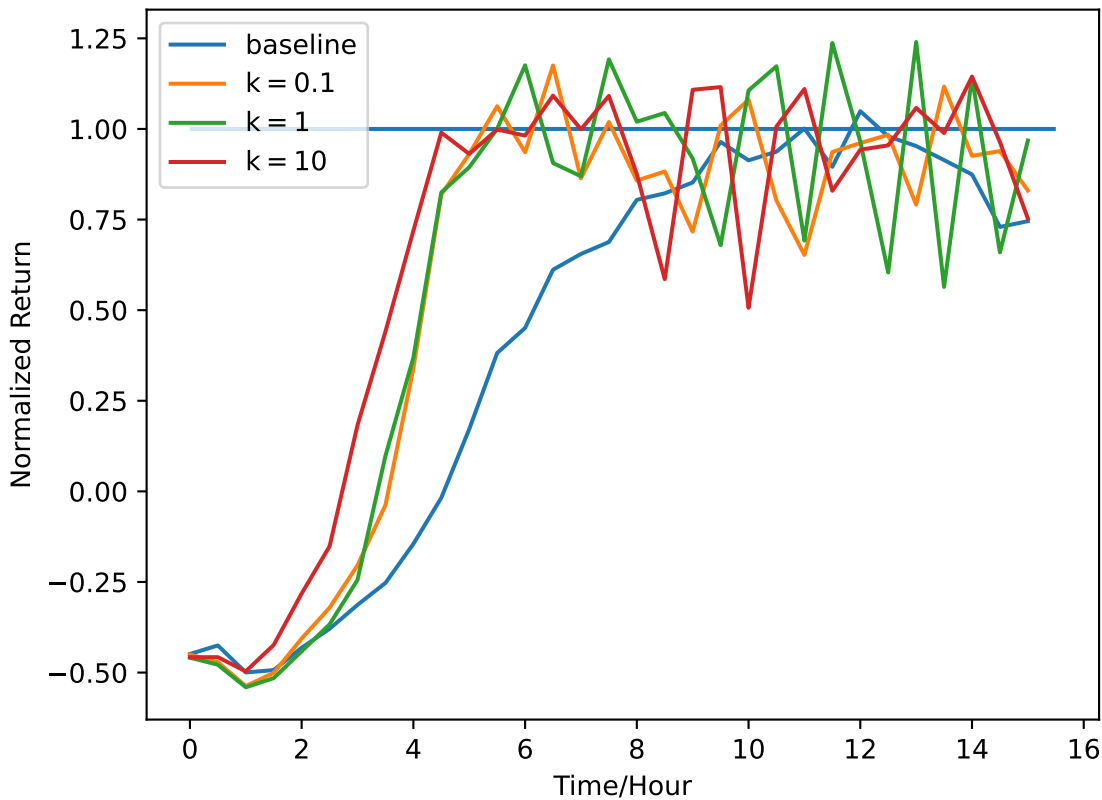

Supplement: supplementary_material [file attachment]

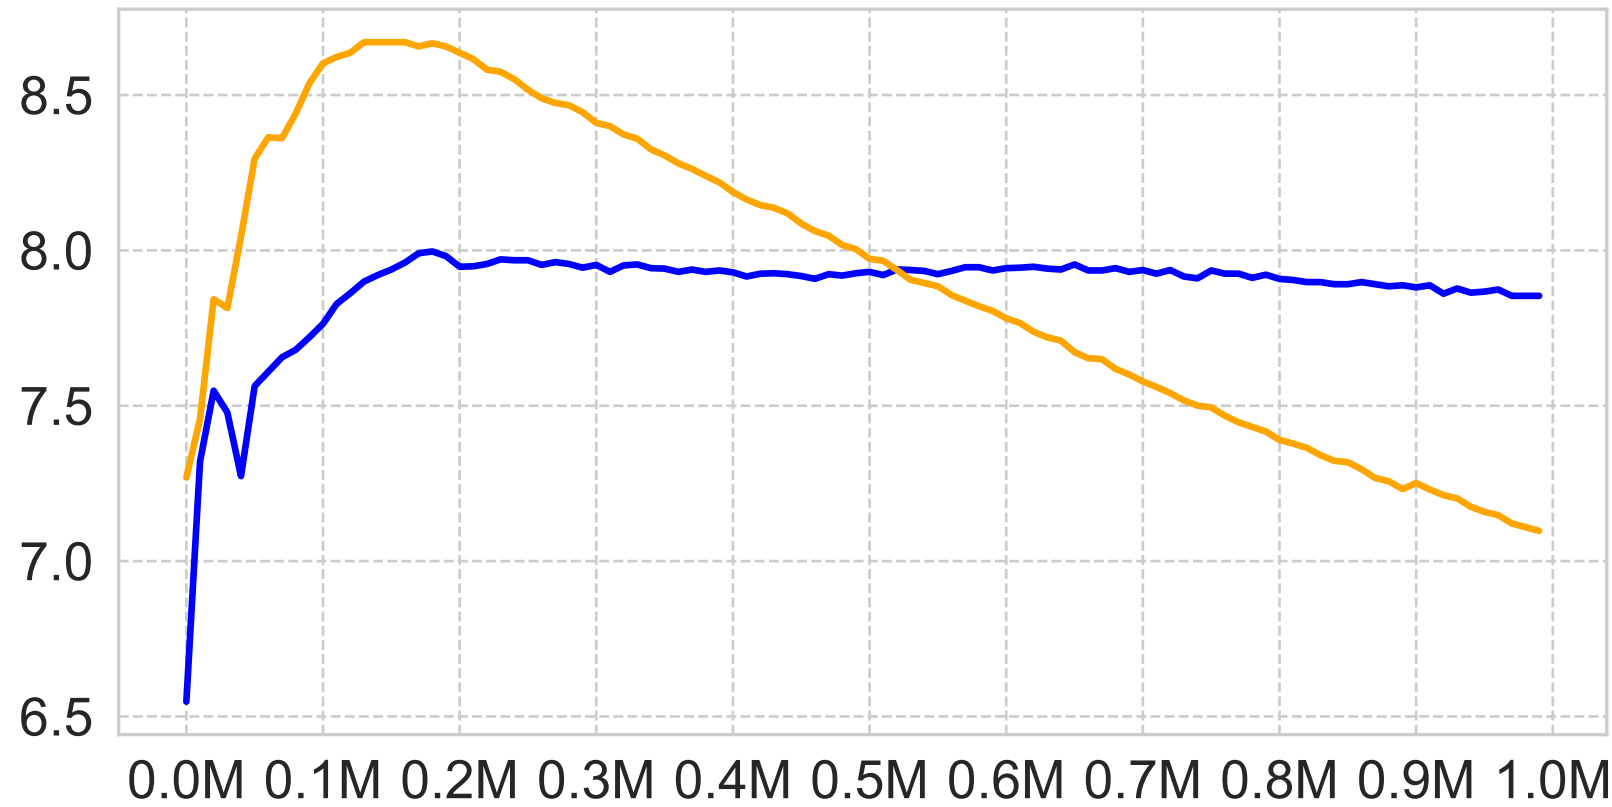

Supplement: supplementary_material [file attachment]

# Return Plot for Half Cheetah

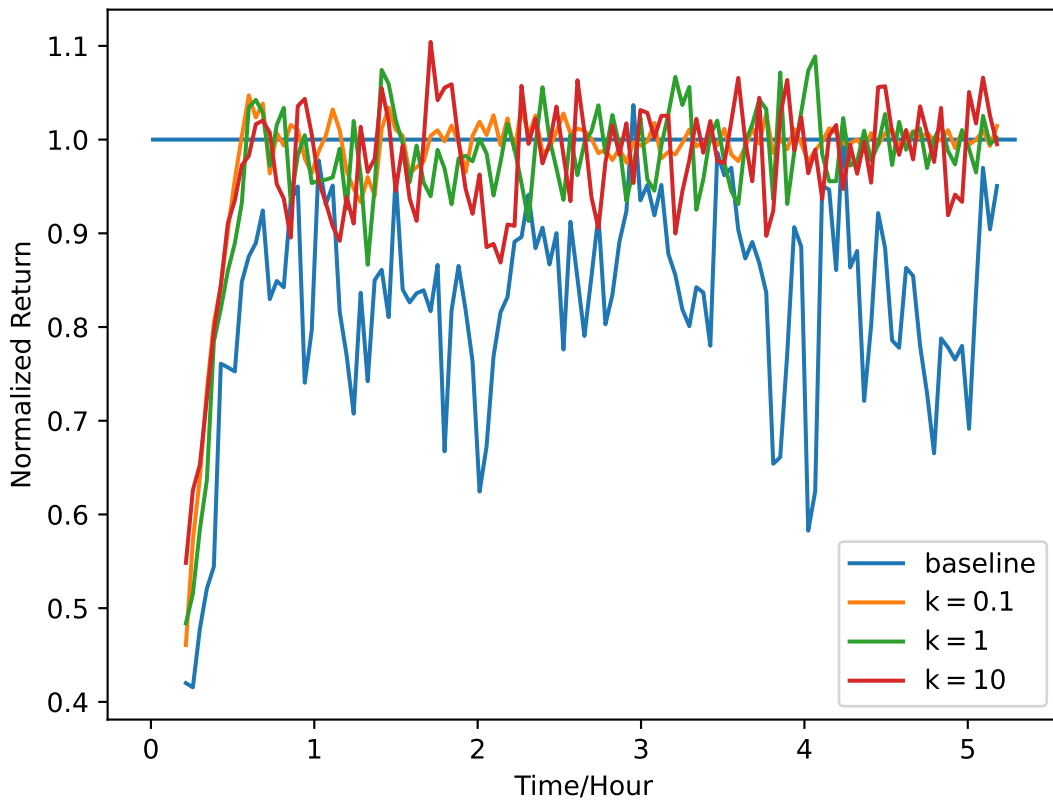

Supplement: supplementary_material [file attachment]

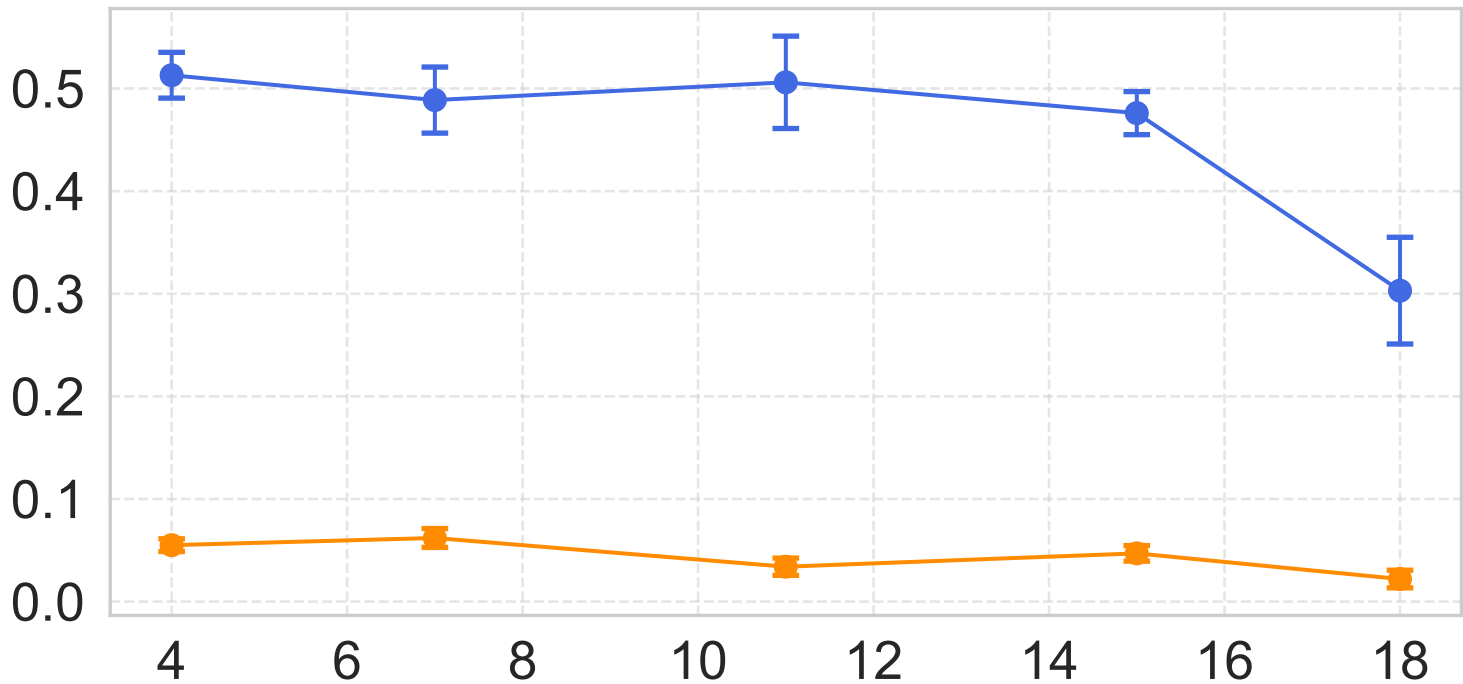

Supplement: supplementary_material [file attachment]

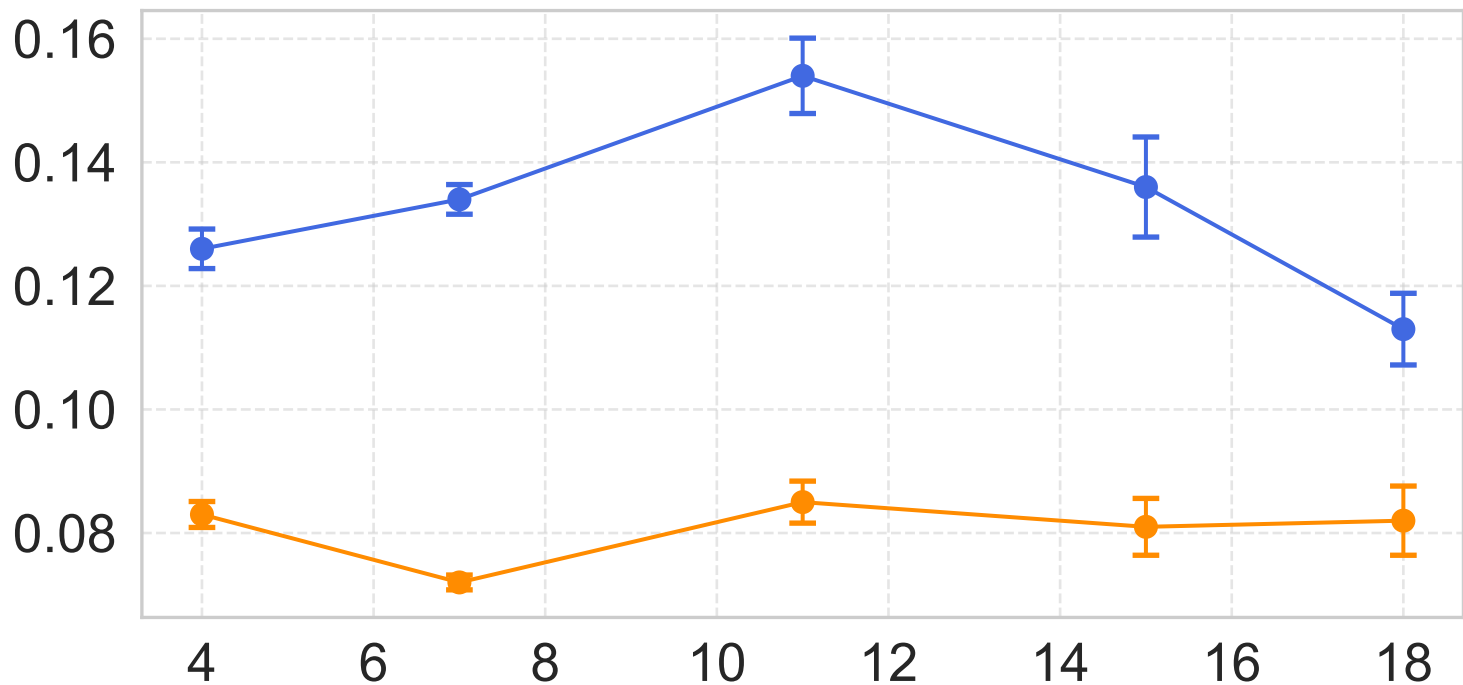

Supplement: supplementary_material [file attachment]

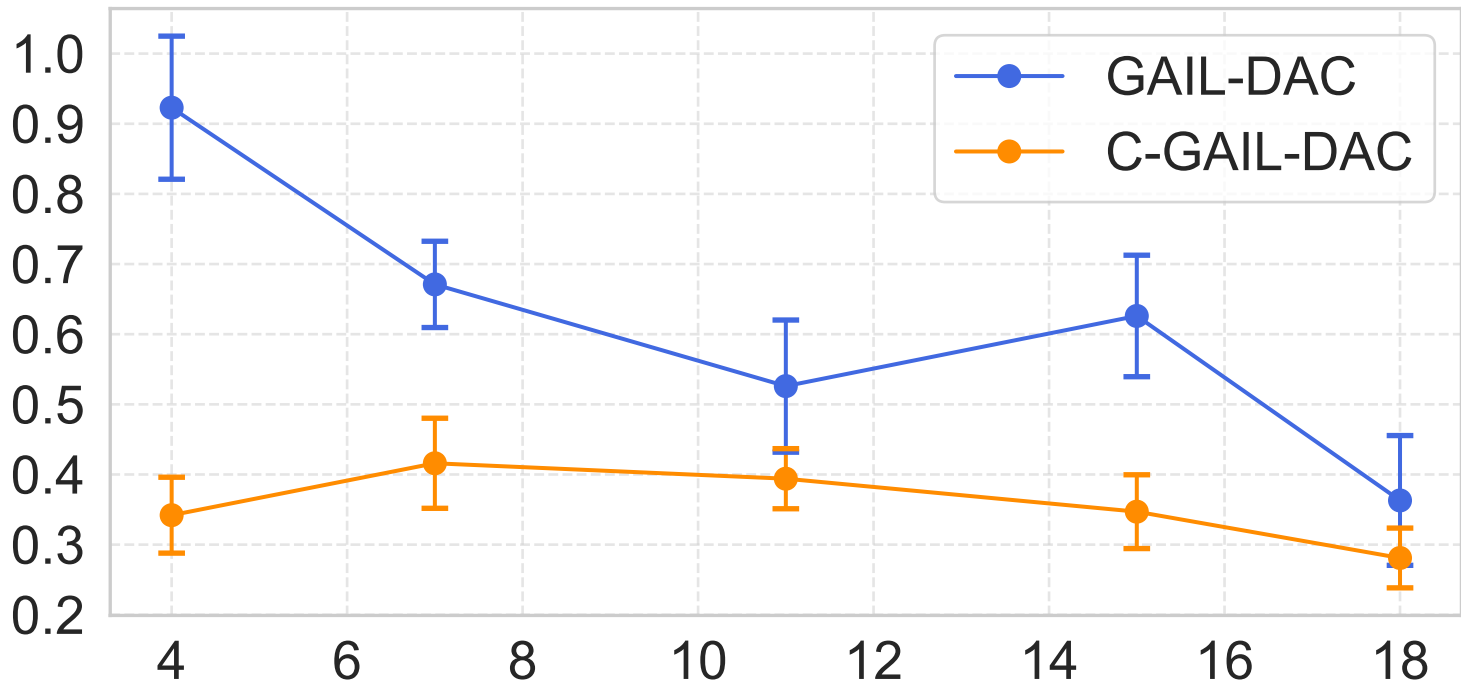

Supplement: supplementary_material [file attachment]

Return Plot for Hopper

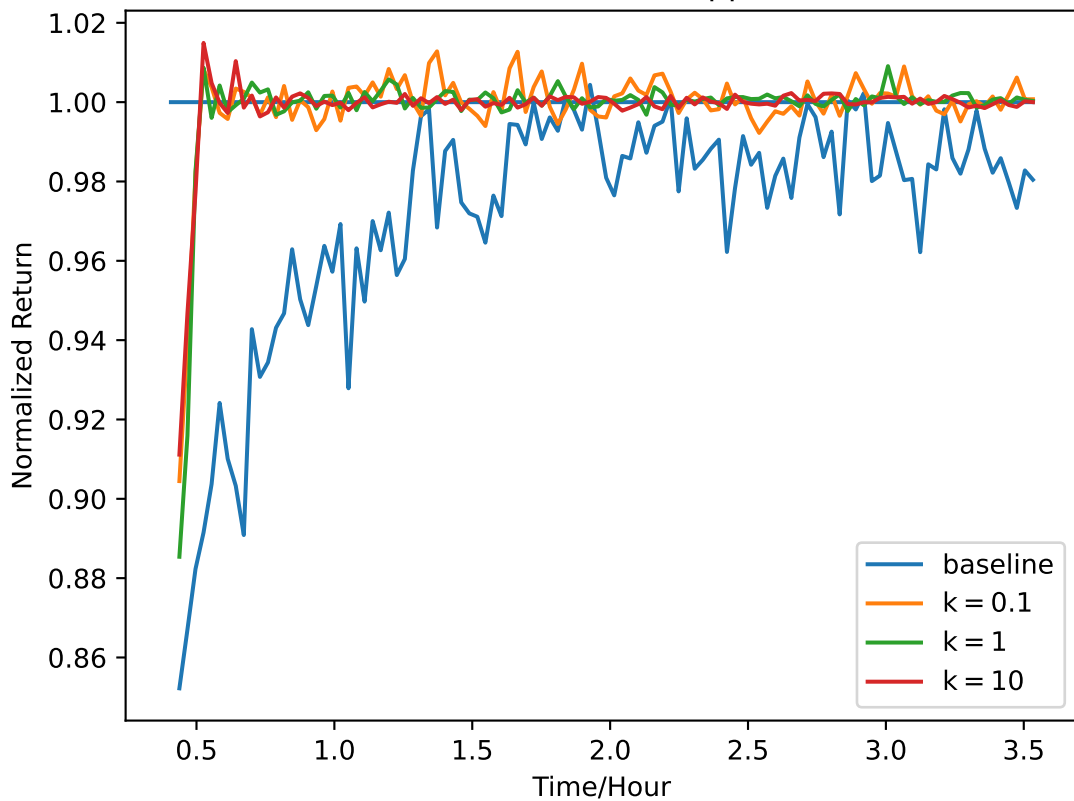

Supplement: supplementary_material [file attachment]

Return Plot for Walker2d

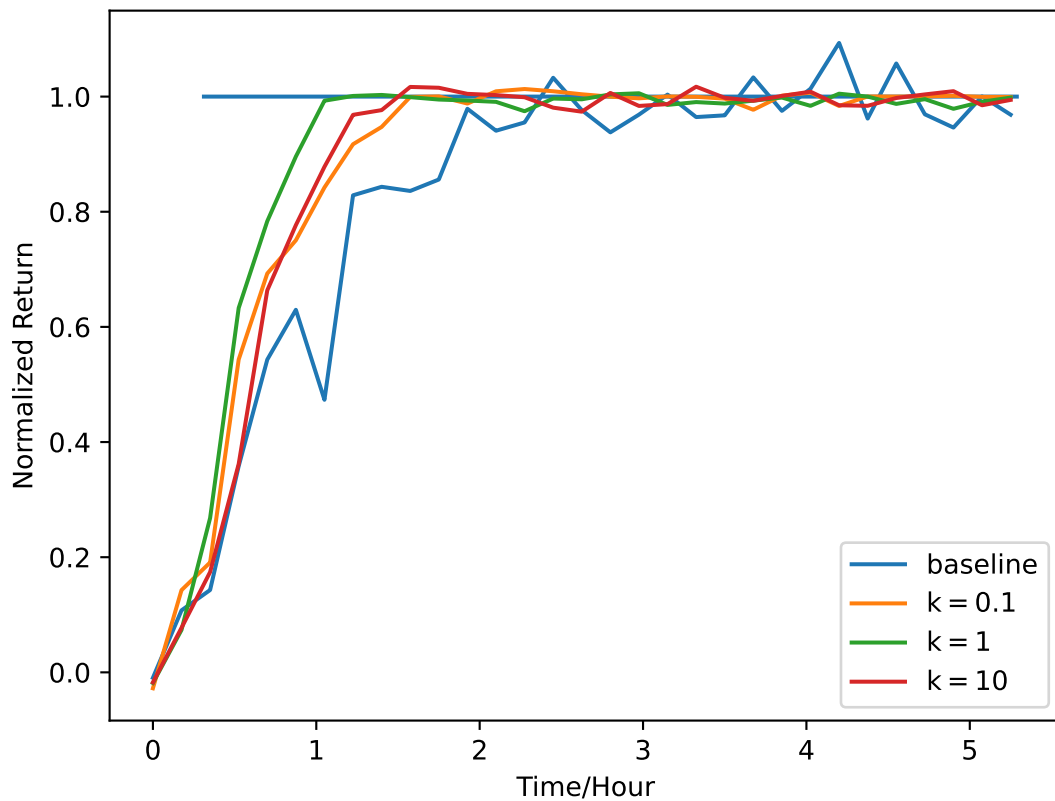

Supplement: supplementary_material [file attachment]

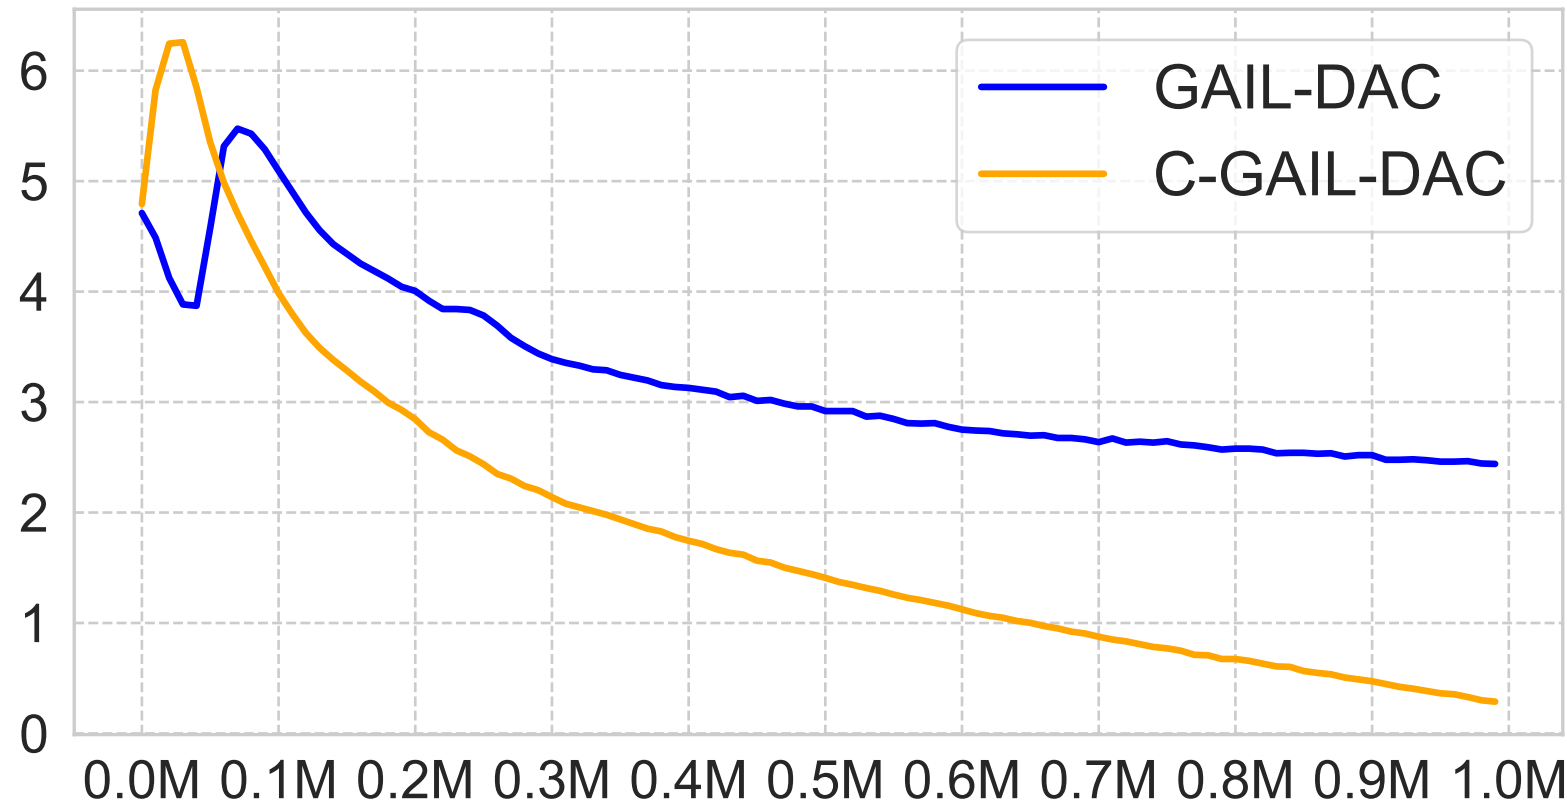

Supplement: supplementary_material [file attachment]

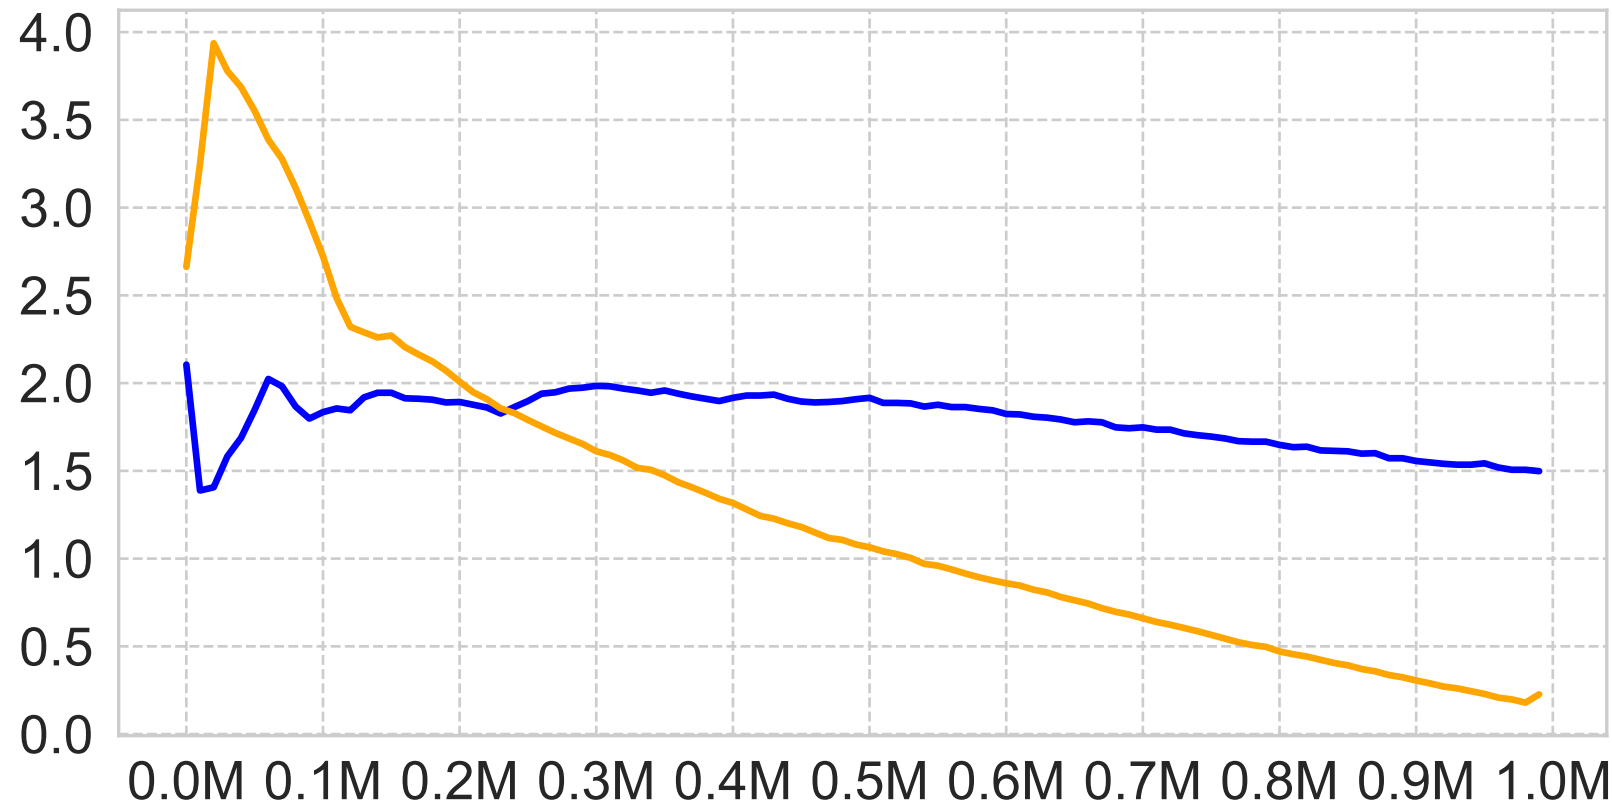

Supplement: supplementary_material [file attachment]
